# Supplementary material for: Organic-Inorganic Hybrid Nanoparticles for Bacterial Inhibition: Synthesis and Characterization of Doped and Undoped ONPs with Ag/Au NPs
Source: MDPI journal article supplement (doi:10.3390/molecules20046002), 2015-04-07
Supplement: s1 [file s1]

# Supplementary Materials

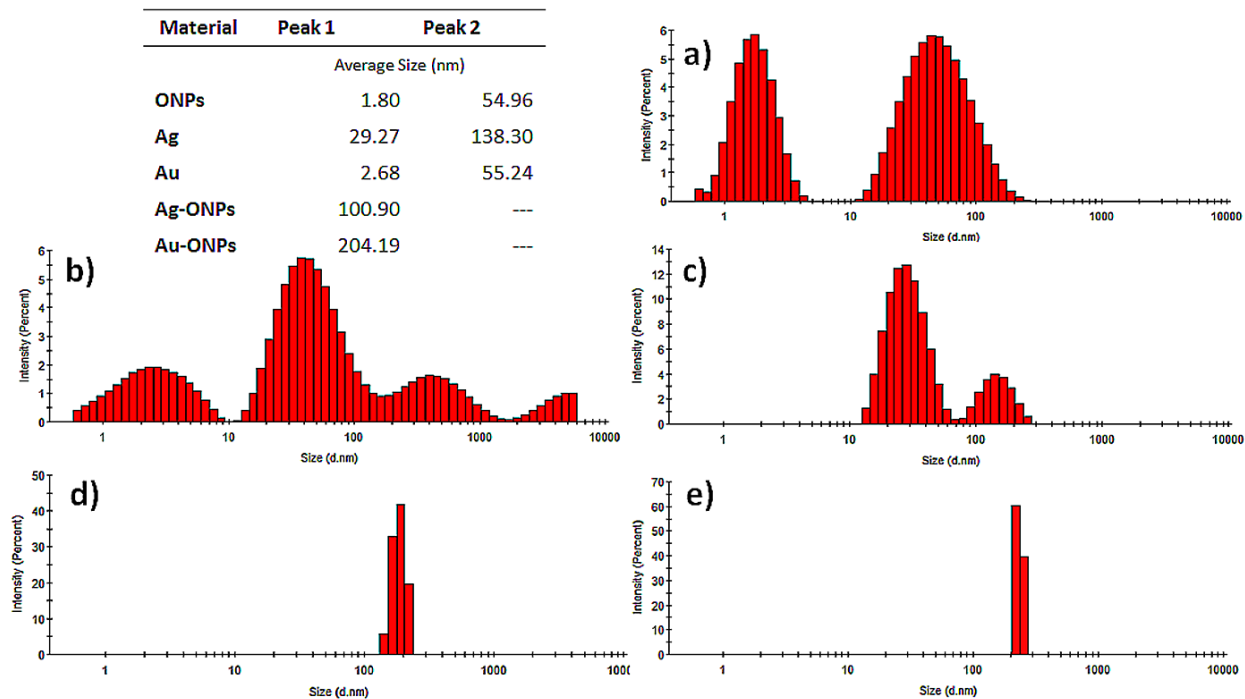

**Figure S1.** Dynamic Light Scattering (DLS) patterns for size distribution of different materials. (a) ONPs; (b) AgNPs; (c) AuNPs; (d) Ag-ONPs hybrid and (e) Au UNPs hybrid.

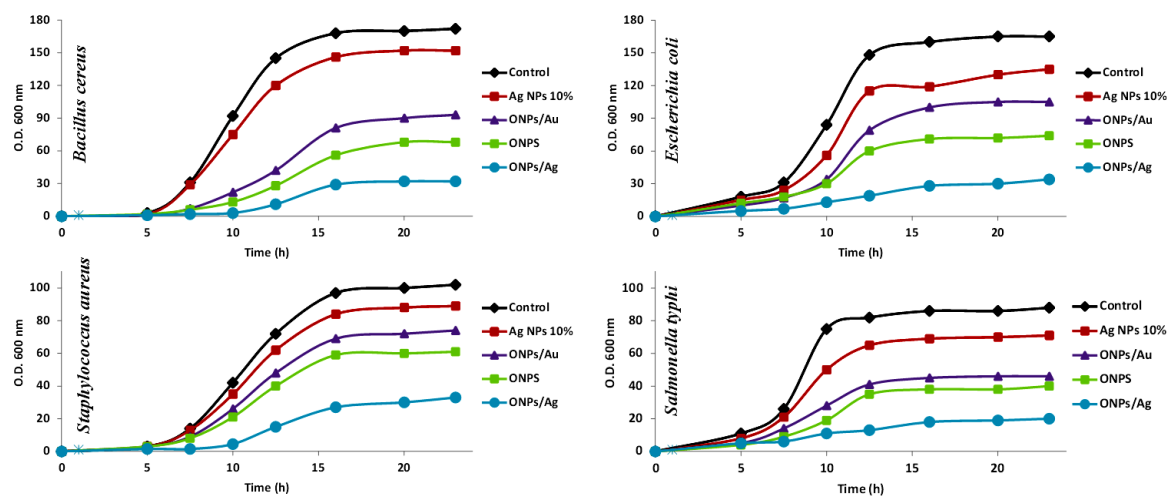

**Figure S2.** Effect of nanoparticles treatment over bacterial growth. Tested materials: ONPs (0.2 mM), ONPs/Ag (0.2 mM), ONPs/Au (0.2 mM) and Ag NPs (0.02 mM).

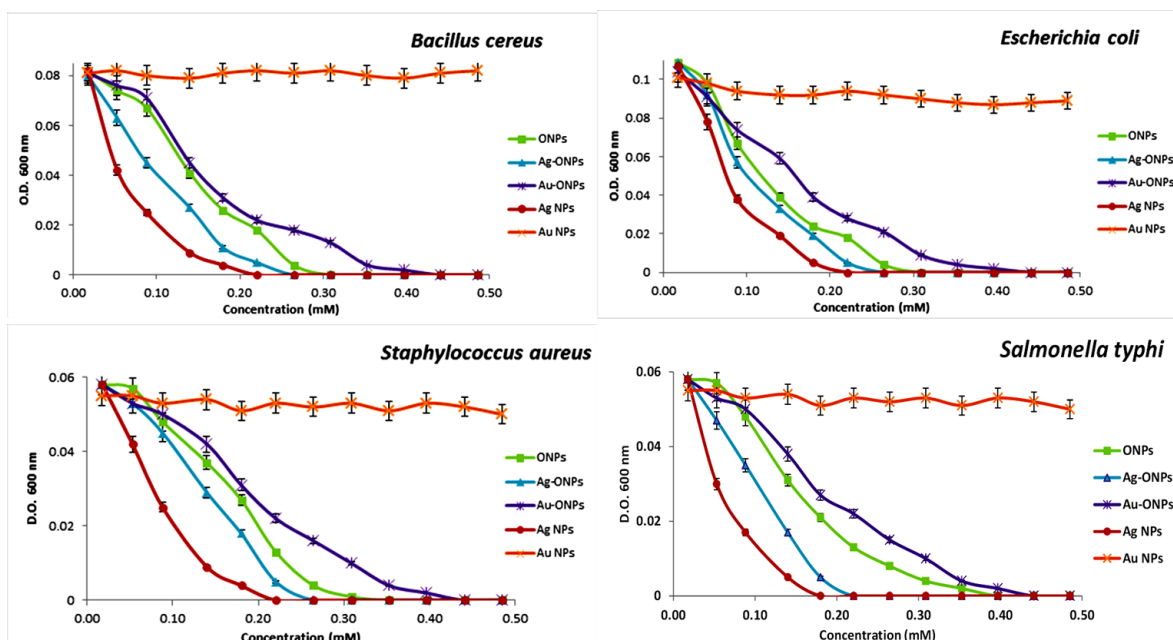

**Figure S3.** Effect of nanoparticles concentration on bacterial growth.

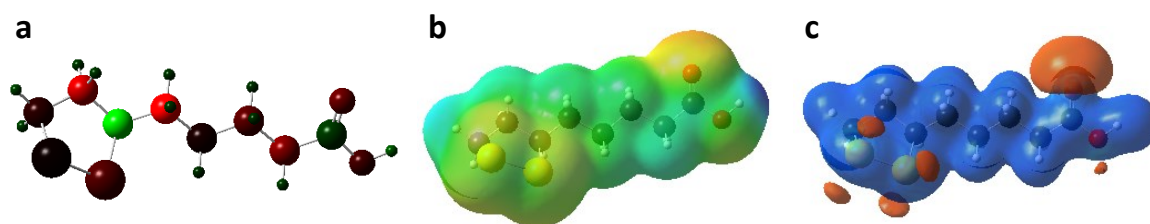

**Figure S4.** Theoretical (a) Mulliken Charges; (b) Electron density map; (c) Electrostatic potential map for Lipoic acid (LA) calculated through B3LYP/6-311G+(d,p).

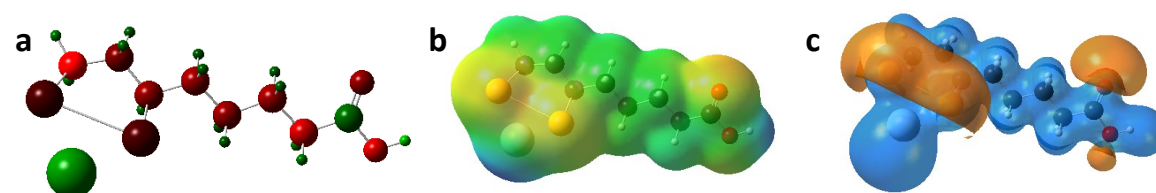

**Figure S5.** Theoretical (a) Mulliken Charges; (b) Electron density map; (c) Electrostatic potential map for Ag decorated Lipoic acid (LA-Ag) calculated through B3LYP/LANL2DZ.

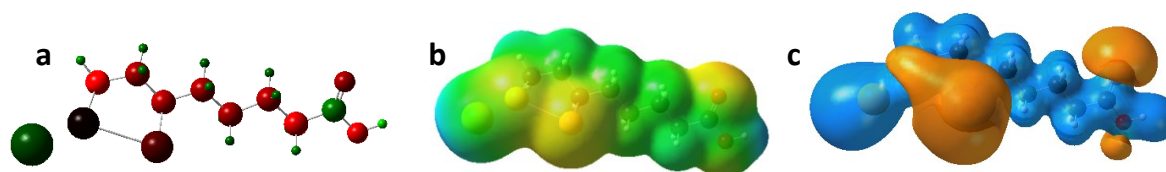

**Figure S6.** Theoretical (a) Mulliken Charges; (b) Electron density map; (c) Electrostatic potential map for Au decorated Lipoic acid (LA-Au) calculated through B3LYP/LANL2DZ.
